# Supplementary material for: Largely enhanced thermal conductivity and thermal stability of ultra high molecular weight polyethylene composites via BN/CNT synergy
Source: PubMed Central journal article supplement — RSC Adv. 2019 Dec 9;9(70):40800–9. doi: 10.1039/c9ra08416a (PMC9076284; doi:10.1039/c9ra08416a), 2019-12-09
Supplement: RA-009-C9RA08416A-s001.pdf [file RA-009-C9RA08416A-s001.pdf]

# Largely Enhanced Thermal Conductivity and Thermal Stability of UPE Composites via BN/CNT Synergy

Yiyu Guo<sup>1</sup>, Changlin Cao<sup>1</sup>, Fubin Luo<sup>1</sup>, Baoquan Huang<sup>1\*</sup>, Liren Xiao<sup>1</sup>, Qingrong Qian<sup>1\*</sup>, and  
Qinghua Chen<sup>1,2</sup>

<sup>1</sup> Engineering Research Center of Polymer Green Recycling of Ministry Education and Fujian Key  
Laboratory of Pollution Control & Resource Reuse, College of Environmental Science and  
Engineering, Fujian Normal University, Fuzhou 350007, China

<sup>2</sup> Fujian Normal University Fuqing Branch, Fuzhou 350300, China

Correspondence should be addressed to Baoquan Huang (Email: qbh811@fjnu.edu.cn) and Qing-  
rong Qian (Email: qrqian@fjnu.edu.cn)

## Contents:

**Figure S1.** The EDS mapping images of (a) UPE/40BN and (b) UPE/40BN/7CNT composite.

**Figure S2.** The TEM images of the UPE/40BN/7CNT composite with different scales.

**Figure S3.** Thermal conductivity of the UPE/CNT composites.

**Figure S4.** Tensile strength (a) and Elongation at break (b) of the UPE composites.

**Figure S5.** Thermal conductivity enhancement of the UPE composites.

**Table S1.** DSC thermal parameters of the UPE/xCNT composites

**Table S2.** Thermal data of the UPE/xCNT composites from TGA

**Table S3.** Tensile strength data for UPE composites.

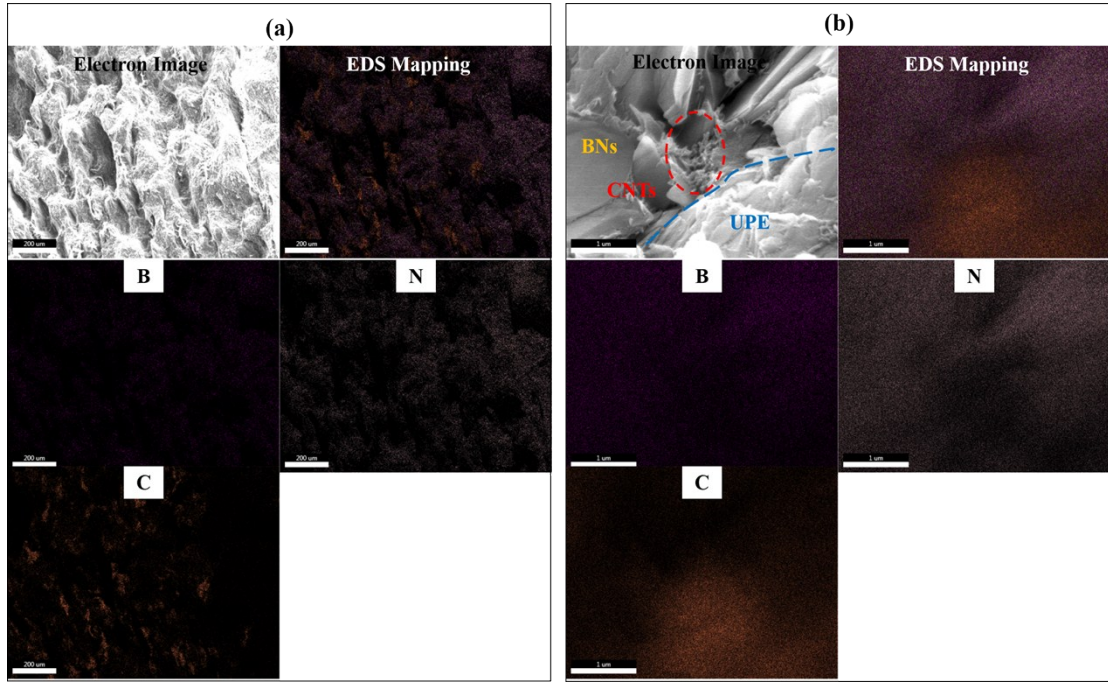

Figure S1. The EDS mapping images of (a) UPE/40BN and (b) UPE/40BN/7CNT composite.

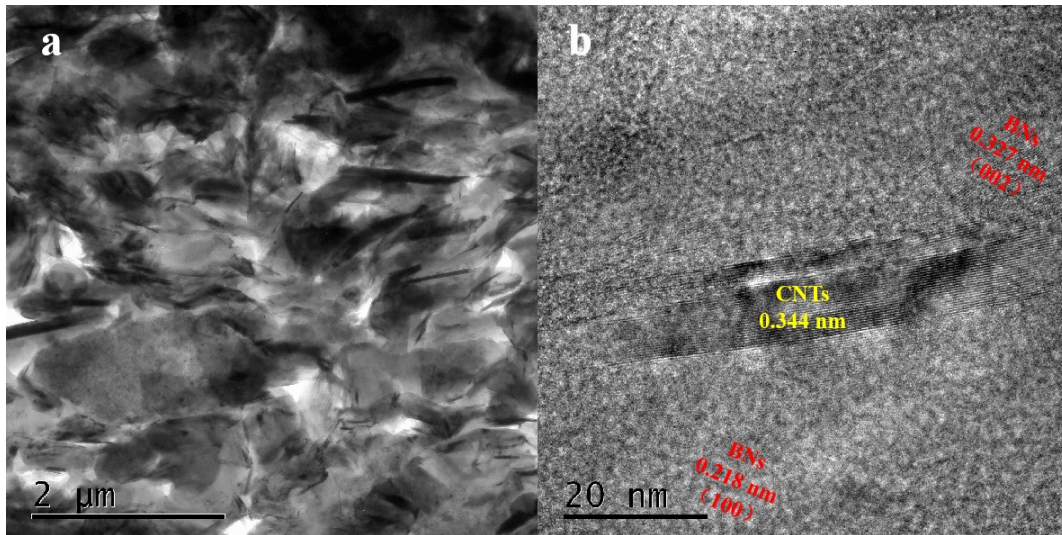

**Figure S2.** The TEM images of the UPE/40BN/7CNT composite with different scales.

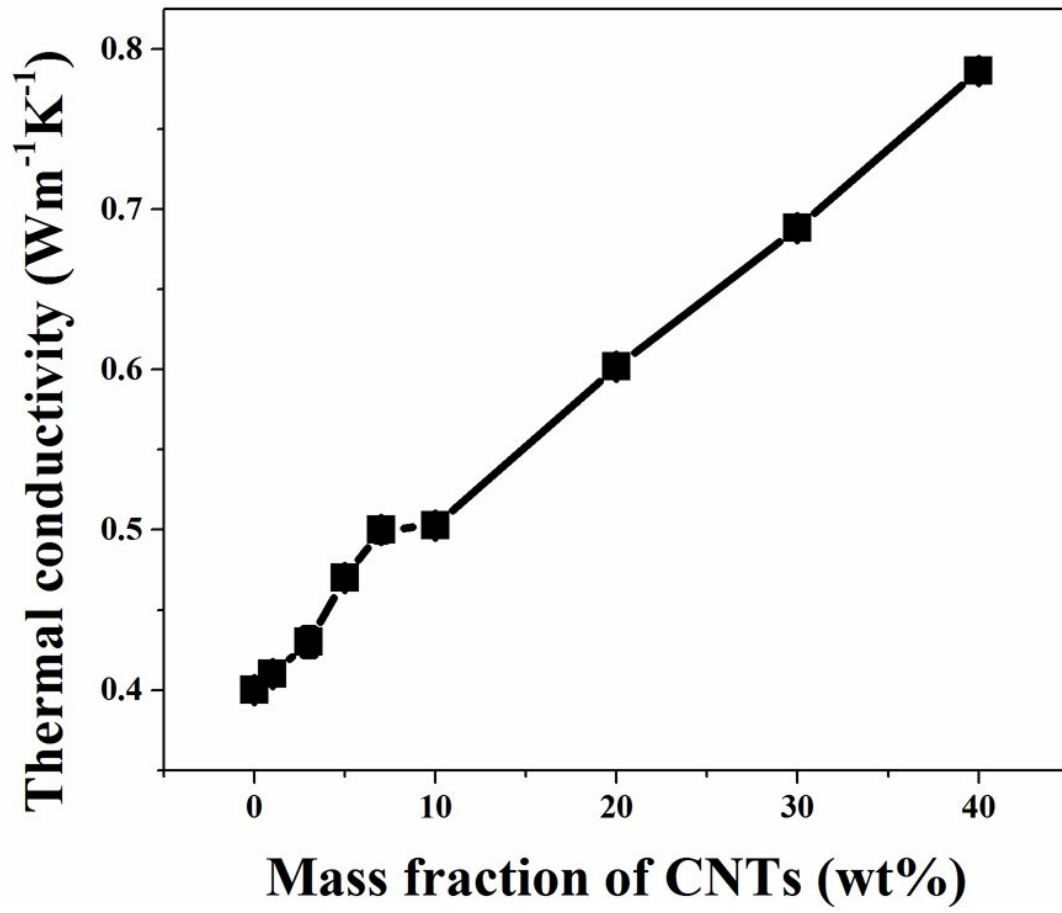

Figure S3. Thermal conductivity of the UPE/CNT composites.

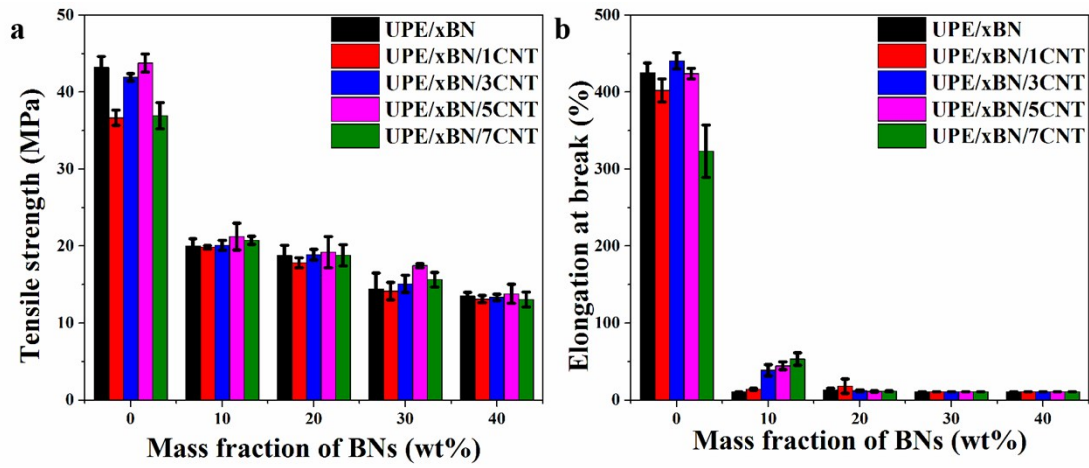

Figure S4. Tensile strength (a) and Elongation at break (b) of the UPE composites.

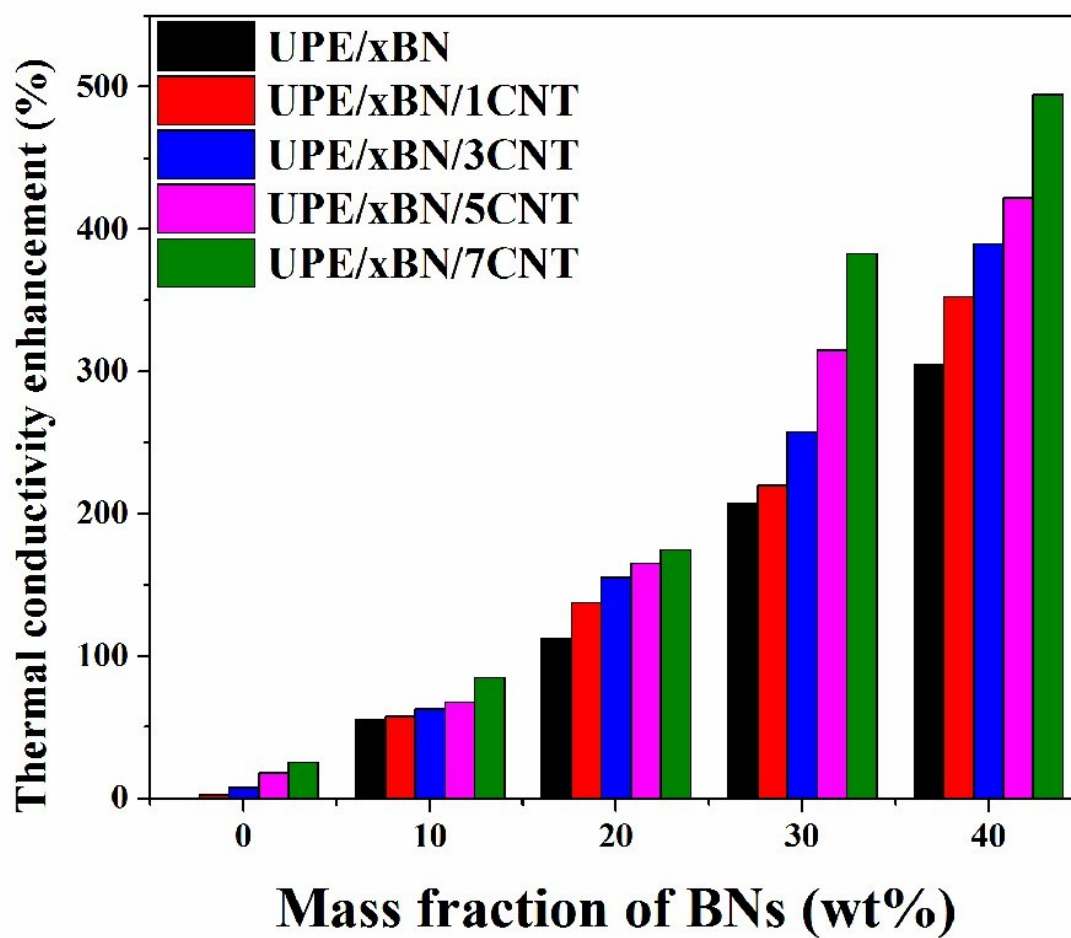

Figure S5. Thermal conductivity enhancement of the UPE composites compared with pure UPE.

Table S1 DSC thermal parameters of the UPE/CNT composites

| Sample    | <b>T<sub>m</sub></b><br>(°C) | <b>ΔH<sub>m</sub></b><br>(J/g) | <b>T<sub>c</sub></b><br>(°C) | <b>ΔH<sub>c</sub></b><br>(J/g) | <b>X<sub>c</sub></b><br>(%) |
|-----------|------------------------------|--------------------------------|------------------------------|--------------------------------|-----------------------------|
| UPE       | 137.4                        | 159.4                          | 116.0                        | 159.9                          | 54.83                       |
| UPE/1CNT  | 139.6                        | 131.3                          | 114.3                        | 130.7                          | 45.73                       |
| UPE/3CNT  | 139.3                        | 136.6                          | 114.2                        | 134.9                          | 48.56                       |
| UPE/5CNT  | 138.9                        | 136.4                          | 115.5                        | 138.8                          | 49.51                       |
| UPE/7CNT  | 137.0                        | 137.2                          | 117.3                        | 135.7                          | 51.42                       |
| UPE/10CNT | 136.8                        | 126.5                          | 117.4                        | 127.0                          | 48.46                       |

Table S2 Thermal data of UPE/CNT composites from TGA

| Sample        | Weight loss temperature (°C) |          |          |                             | $T_{\text{HRI}}^{\text{b}}$<br>(°C) | Residual<br>weight<br>(%) |
|---------------|------------------------------|----------|----------|-----------------------------|-------------------------------------|---------------------------|
|               | $T_5$                        | $T_{30}$ | $T_{50}$ | $T_{\text{max}}^{\text{a}}$ |                                     |                           |
| UPE           | 431.7                        | 458.6    | 467.4    | 473.6                       | 219.4                               | 0                         |
| UPE/3CNT      | 441.5                        | 468.1    | 476.5    | 479.8                       | 224.2                               | 3.24                      |
| UPE/5CNT      | 457.5                        | 478.7    | 485.6    | 488.3                       | 230.4                               | 4.92                      |
| UPE/7CNT      | 458.4                        | 478.8    | 485.6    | 487.3                       | 230.6                               | 7.03                      |
| UPE/10BN/3CNT | 451.0                        | 475.1    | 482.9    | 484.8                       | 228.1                               | 13.01                     |
| UPE/20BN/3CNT | 453.6                        | 478.3    | 486.7    | 486.3                       | 229.5                               | 22.68                     |
| UPE/30BN/3CNT | 458.1                        | 481.4    | 490.3    | 486.9                       | 231.3                               | 32.65                     |
| UPE/40BN/3CNT | 458.2                        | 481.6    | 491.2    | 486.1                       | 231.4                               | 42.7                      |



Table S3 Tensile strength data for UPE composites.

| tensile strength (MPa) | 0BN   | 10BN  | 20BN  | 30BN  | 40BN  |
|------------------------|-------|-------|-------|-------|-------|
| 0CNT                   | 43.21 | 20.0  | 18.76 | 14.42 | 13.48 |
| 1CNT                   | 36.66 | 19.84 | 17.83 | 14.16 | 13.11 |
| 3CNT                   | 41.90 | 20.10 | 18.88 | 15.09 | 13.34 |
| 5CNT                   | 43.77 | 21.23 | 19.20 | 17.46 | 13.80 |
| 7CNT                   | 36.94 | 20.76 | 18.80 | 15.63 | 13.05 |
